# Supplementary material
Source: PubMed Central journal article supplement (PMC3811328)
Supplement: AAC.01057-13_zac011132275so1.pdf [file AAC.01057-13_zac011132275so1.pdf]

| <b>Supplemental Table 1S.</b> Summary of demographics and baseline characteristics                       |                                              |                                             |                          |
|----------------------------------------------------------------------------------------------------------|----------------------------------------------|---------------------------------------------|--------------------------|
|                                                                                                          | <b>Micafungin<br/>300 mg QOD<br/>(n=132)</b> | <b>Micafungin<br/>150 mg QD<br/>(n=189)</b> | <b>Total<br/>(n=321)</b> |
| Female, n (%)                                                                                            | 70 (53.0)                                    | 109 (57.7)                                  | 179 (55.8)               |
| Race, n (%)                                                                                              |                                              |                                             |                          |
| Black                                                                                                    | 82 (62.1)                                    | 110 (58.2)                                  | 192 (59.8)               |
| Mestizo                                                                                                  | 9 (6.82)                                     | 36 (19.1)                                   | 67 (20.9)                |
| Caucasian                                                                                                | 34 (25.8)                                    | 33 (17.5)                                   | 45 (14.0)                |
| Other*                                                                                                   | 7 (5.30)                                     | 10 (5.29)                                   | 17 (5.30)                |
| Age (years)                                                                                              |                                              |                                             |                          |
| Mean (CV%)                                                                                               | 35.8 (24.3)                                  | 35.8 (23.4)                                 | 35.8 (23.7)              |
| Weight (kg)                                                                                              |                                              |                                             |                          |
| Mean (CV%)                                                                                               | 55.1 (24.9)                                  | 53.9 (23.7)                                 | 54.4 (24.2)              |
| Primary Underlying Disease, n (%)                                                                        |                                              |                                             |                          |
| HIV                                                                                                      | 127 (96.2)                                   | 184 (97.4)                                  | 311 (96.9)               |
| Diabetes Mellitus                                                                                        | 1 (0.76)                                     | 0                                           | 1 (0.31)                 |
| Lung Disorder                                                                                            | 2 (1.52)                                     | 2 (1.06)                                    | 4 (1.25)                 |
| Other Disease**                                                                                          | 1 (0.76)                                     | 2 (1.06)                                    | 3 (0.93)                 |
| Malignancy                                                                                               | 1 (0.76)                                     | 0                                           | 1 (0.31)                 |
| Immune Disorder***                                                                                       | 0                                            | 1 (0.53)                                    | 1 (0.31)                 |
| Baseline Mucosal Grade n (%)                                                                             |                                              |                                             |                          |
| 1                                                                                                        | 40 (30.3)                                    | 39 (20.6)                                   | 79 (24.6)                |
| 2                                                                                                        | 55 (41.7)                                    | 93 (49.2)                                   | 148 (46.1)               |
| 3                                                                                                        | 37 (28.0)                                    | 57 (30.2)                                   | 94 (29.3)                |
| Fungal Organisms Isolated from Baseline Fungal Culture****                                               |                                              |                                             |                          |
| Any organism                                                                                             | 129 (97.7)                                   | 184 (97.4)                                  | 313 (97.5)               |
| <i>C. albicans</i>                                                                                       | 126 (95.5)                                   | 181 (95.8)                                  | 307 (95.6)               |
| <i>C. glabrata</i>                                                                                       | 5 (3.79)                                     | 5 (2.65)                                    | 10 (3.12)                |
| <i>C. tropicalis</i>                                                                                     | 2 (1.51)                                     | 1 (0.53)                                    | 3 (0.93)                 |
| <i>C. parapsilosis</i>                                                                                   | 1 (0.76)                                     | 0                                           | 1 (0.31)                 |
| <i>C. guilliermondii</i>                                                                                 | 2 (1.51)                                     | 0                                           | 2 (0.62)                 |
| <i>C. catenulate</i>                                                                                     | 0                                            | 1 (0.53)                                    | 1 (0.31)                 |
| <i>C. krusei</i>                                                                                         | 0                                            | 2 (1.06)                                    | 2 (0.62)                 |
| <i>Candida sp.</i>                                                                                       | 0                                            | 1 (0.53)                                    | 1 (0.31)                 |
| *Other race: Native Brazillian, Mulatto, Mestize, Coloured, Cape Coloured.                               |                                              |                                             |                          |
| **Other Disease: Antibiotic/Losec therapy (ulcers), obesity                                              |                                              |                                             |                          |
| ***Immune Disorder: Systemic lupus erythematosus                                                         |                                              |                                             |                          |
| ****More than one organism may have been isolated from a culture. The sum of the isolates may be > 100%. |                                              |                                             |                          |
